# Supplementary material for: Analytical Methods for Anatoxin-a Determination: A Review
Source: MDPI journal article supplement (doi:10.3390/toxins16040198), 2024-04-19
Supplement: s1 [file s1]

**Table S1.** Analytical methods focused on the determination of ATX-a up to 2003.

| Type of sample                            | Analytical method      | Linear concentration range                                | Validation parameters                                                                        | More information                                                                                                                                                                                                            | References |
|-------------------------------------------|------------------------|-----------------------------------------------------------|----------------------------------------------------------------------------------------------|-----------------------------------------------------------------------------------------------------------------------------------------------------------------------------------------------------------------------------|------------|
| Cyanobacterial cultures                   | HPLC-UV                | -                                                         | -                                                                                            | -                                                                                                                                                                                                                           | [87]       |
| Cyanobacterial cultures                   | GC-ECD                 | 8.7-87.0 ng/extract                                       | -                                                                                            | Internal standard: ( $\pm$ )-sec-butylnipecotate<br>Derivatization reagent: trichloroacetic anhydride.                                                                                                                      | [104]      |
| Cyanobacterial cultures                   | TLC-UV<br>HPLC-UV      | HPLC: 20-100 ng                                           | -                                                                                            | -                                                                                                                                                                                                                           | [30]       |
| Cyanobacterial bloom and water samples    | GC-MS                  | 1-20 mg Anabaena/20 mg sample                             | LOD: 5 $\mu$ g/g                                                                             | -                                                                                                                                                                                                                           | [99]       |
| Cyanobacterial cultures and urine samples | DCI-MS/MS              | 10-10000 pg                                               | LOD: 10 pg/ $\mu$ L                                                                          | Different MS methods were evaluated, with DCI-MS being the method with the best results. Isobutane or ammonia DCI-MS can be used to detect ATX-a. Moreover, it is a simple method that does not require an extraction step. | [98]       |
| Cyanobacterial cultures                   | TLC                    | 10-100 $\mu$ g/g                                          | LOD: 10 $\mu$ g/g                                                                            | Facile high-capacity screening.<br>No clear interfering spots in the vicinity of ATX-a.                                                                                                                                     | [31]       |
| Cyanobacterial bloom                      | HPLC-UV                | 0.084-3.820 $\mu$ g/mL                                    | LOD: 0.8 ng<br>Precision (RSD%): 1.1-1.4%<br>Inter-day (RSD%): 2.4%<br>Recovery: 90.9-100.0% | Used an isocratic ion-pair reversed-phase HPLC method. Determined also HATX-a.                                                                                                                                              | [88]       |
| Cyanobacterial cultures                   | HPLC-UV<br>GC-MS<br>CE | HPLC-UV: 0.07-5.40 $\mu$ g/mL<br>CE: 1.60-8.00 $\mu$ g/mL | -                                                                                            | Determined also HATX-a and propylanatoxin.                                                                                                                                                                                  | [89]       |

|                                                        |                    |               |                                                                            |                                                                                                                                                                                                   |       |
|--------------------------------------------------------|--------------------|---------------|----------------------------------------------------------------------------|---------------------------------------------------------------------------------------------------------------------------------------------------------------------------------------------------|-------|
| Cyanobacterial cultures                                | GC-ECD             | -             | LOD: 2.5 pg                                                                | Derivatization reagent:<br>pentafluorobenzylbromide.                                                                                                                                              | [105] |
| Water samples                                          | HPLC-FLD           | 1-20 µg/L     | LOD: 0.1 µg/L<br>Recovery: 83-97%                                          | Derivatization reagent: NBD-F.                                                                                                                                                                    | [90]  |
| Water samples (raw and treated water)                  | HPLC-UV            | 1-5 µg/L      | Response factor (peak area/concentration)<br>RSD: 1.30%<br>LOD: 0.025 µg/L | Used extraction with styrene-divinylbenzene copolymer sorbent.                                                                                                                                    | [91]  |
| Water samples and cyanobacterial bloom                 | HPLC-FLD           | -             | Recovery: 83.2-84.9%<br>RSD%: 1.7-3.9%<br>LOD: < 10 ng/L                   | Derivatization reagent: NBD-F<br>The investigated compounds were ATX-a, HATX-a and their degradation products: dihydroanatoxin-a, epoxyanatoxin-a, dihydrohomoanatoxin-a and epoxyhomoanatoxin-a. | [94]  |
| Water samples                                          | LC-ESI-MS          | 5-5000 ng/L   | Recovery: 75.7%<br>RSD%: 7.2%<br>LOD: 2.1 ng/L<br>LOQ: 15.2 ng/L           | Automated on-line derivatization procedure with fluorenyl methylchloroformate.<br>ATX-a extracted using SPE.                                                                                      | [111] |
| Food supplement (Spirulina tablet and capsule samples) | SRM micro-LC-MS/MS | 0.2-2.5 µg/mL | -                                                                          | The investigated compounds were ATX-a, HATX-a and their degradation products: dihydroanatoxin-a, epoxyanatoxin-a, dihydrohomoanatoxin-a and epoxyhomoanatoxin-a.                                  | [108] |
| Water samples                                          | HPLC-FLD           | 50-1500 ng/mL | LOD: 20 ng/mL<br>Intra-day (RSD%): 7.6%                                    | Derivatization reagent: NBD-F.<br>SPME coupled to HPLC was used.<br>Good repeatability was obtained by two different derivatizing addition method: microsyringe and spray procedure.              | [95]  |

ATX-a: anatoxin-a; CE: capillary electrophoresis; DCI: desorption chemical ionization; ECD: Electron capture detector; ESI: electrospray ionization; FLD: fluo-rescence detection; GC: gas chromatography; HATX-a: homoanatoxin-a; HPCL: high-performance liquid chromatography; LOD: limit of detection; LOQ: limit of quantification; MS/MS: tandem mass spectrometry; NBD-F: 7-

Fluoro-4-nitro-2,1,3-benzoxadiazole; RSD: relative standard deviation; SPE: solid-phase extraction; SPME: solid-phase microextraction; SRM: selected reaction monitoring; TLC: thin layer chromatography; UV: ultraviolet

**Table S2.** Analytical methods focused on the determination of cyanotoxins mixtures containing ATX-a up to 2003.

| Type of sample | Cyanotoxins                                     | Analytical method | Linear concentration range                                                | Global validation parameters of multitoxins methods                           | More information and specific data of ATX-a                                                                                                                                                 | References |
|----------------|-------------------------------------------------|-------------------|---------------------------------------------------------------------------|-------------------------------------------------------------------------------|---------------------------------------------------------------------------------------------------------------------------------------------------------------------------------------------|------------|
| Fish muscle    | ATX-a, MCs (-LR, -RR, -YR, -D-3)                | LC-MS             | 15-100 ng/g (ATX-a)<br>5-100 ng/g (MC-D-3 and -RR)<br>10-100 ng/g (MC-YR) | LOD: 0.5-7 ng/g<br>LOQ: 1-15 ng/g<br>Recoveries: 70-97%                       | The method requires only a simple clean-up procedure with SPE-column and no derivatization.<br>For ATX-a: LOD: 7 ng/g, LOQ: 15 ng/g and recoveries: 70-73%                                  | [100]      |
| Water samples  | ATX-a, MCs (-LR, -RR, -YR and -D-3)             | LC-MS             | 0.4-30 ng/mL (ATX-a, MC-D-3 and -RR)<br>0.5-30 ng/mL (MC-LR and -YR)      | LOD: 0.2-0.25 ng/mL<br>LOQ: 0.4-0.5 ng/L<br>Recoveries: 84-93%                | The method requires only a simple clean-up procedure with SPE-column and no derivatization.<br>For ATX-a: LOD: 0.2 ng/mL, LOQ: 0.4 ng/L and recoveries: 84-85%                              | [101]      |
| Water samples  | ATX-a, STX, MCs (-LR, -YR, -RR and -LA) and NOD | HPLC-ESI-MS/MS    | 20-1000 ng/L (ATX-a and MCs)<br>100-10000 ng/L STX                        | LOD: 27-425 ng/L<br>LOQ: 40-634 ng/L<br>Recoveries: 3.2-96%<br>RSD%: 1.6-5.5% | SPE with RP-C <sub>18</sub> was used for sample preparation. MCs and NOD have >79% recoveries, ATX-a 50% and STX 3%.<br>For ATX-a: LOD: 30 ng/L, LOQ: 44 ng/L, recovery: 50% and RSD%: 1.9% | [102]      |

ATX-a: anatoxin-a; ESI: electrospray ionization; HPCL: high-performance liquid chromatography; LC: liquid chromatography; LOD: limit of detection; LOQ: limit of quantification; MC: microcystin; MS: mass spectrometry; MS/MS: tandem mass spectrometry; NOD: nodularin; RP: reversed-phase; RSD: relative standard deviations (Precision, repeatability and reproducibility); SPE: solid-phase extraction; STX: saxitoxin.

**Table S3.** Risk of bias for the methodological quality of studies reporting different analytical methods for ATX-a determination. 0: not reported; 1: not appropriately or clearly evaluated; 2: appropriately evaluated. M: medium (4-6); L: low (7-8); H: high (0-3).

| Reference          | Analytical validation<br>(Linear range, LOD,<br>LOQ, RSD, recovery<br>etc.) | Well<br>characterized<br>sample | Full definition<br>of the<br>methodology | Clarity of<br>conclusions | Total | Risk of Bias |
|--------------------|-----------------------------------------------------------------------------|---------------------------------|------------------------------------------|---------------------------|-------|--------------|
| <i>ATX-a alone</i> |                                                                             |                                 |                                          |                           |       |              |
| [87]               | 0                                                                           | 1                               | 1                                        | 0                         | 2     | H            |
| [104]              | 0                                                                           | 1                               | 1                                        | 0                         | 2     | H            |
| [30]               | 0                                                                           | 1                               | 1                                        | 0                         | 2     | H            |
| [99]               | 1                                                                           | 1                               | 2                                        | 0                         | 4     | M            |
| [98]               | 1                                                                           | 2                               | 1                                        | 1                         | 5     | M            |
| [31]               | 1                                                                           | 2                               | 1                                        | 1                         | 5     | M            |
| [88]               | 2                                                                           | 1                               | 2                                        | 2                         | 7     | L            |
| [89]               | 0                                                                           | 0                               | 0                                        | 1                         | 1     | H            |
| [105]              | 0                                                                           | 2                               | 2                                        | 0                         | 4     | M            |
| [90]               | 1                                                                           | 1                               | 1                                        | 0                         | 3     | H            |
| [91]               | 1                                                                           | 1                               | 1                                        | 0                         | 3     | H            |
| [94]               | 1                                                                           | 1                               | 2                                        | 2                         | 6     | M            |
| [111]              | 2                                                                           | 1                               | 2                                        | 1                         | 6     | M            |
| [108]              | 0                                                                           | 2                               | 1                                        | 0                         | 3     | H            |
| [95]               | 1                                                                           | 2                               | 2                                        | 2                         | 7     | L            |
| [32]               | 1                                                                           | 2                               | 2                                        | 1                         | 6     | M            |
| [33]               | 0                                                                           | 1                               | 2                                        | 0                         | 3     | H            |
| [34]               | 2                                                                           | 2                               | 2                                        | 2                         | 8     | L            |
| [35]               | 0                                                                           | 2                               | 2                                        | 1                         | 5     | M            |
| [36]               | 1                                                                           | 2                               | 2                                        | 2                         | 7     | L            |
| [37]               | 1                                                                           | 2                               | 2                                        | 2                         | 7     | L            |
| [38]               | 2                                                                           | 2                               | 2                                        | 2                         | 8     | L            |
| [39]               | 2                                                                           | 2                               | 2                                        | 2                         | 8     | L            |

|                                              |   |   |   |   |   |   |
|----------------------------------------------|---|---|---|---|---|---|
| [40]                                         | 0 | 2 | 2 | 1 | 5 | M |
| [22]                                         | 2 | 2 | 2 | 0 | 6 | M |
| [41]                                         | 2 | 2 | 2 | 2 | 8 | L |
| [42]                                         | 2 | 2 | 2 | 2 | 8 | L |
| [43]                                         | 2 | 2 | 2 | 2 | 8 | L |
| [44]                                         | 1 | 2 | 2 | 1 | 6 | M |
| [45]                                         | 1 | 1 | 2 | 2 | 6 | M |
| [46]                                         | 2 | 2 | 2 | 2 | 8 | L |
| [47]                                         | 2 | 1 | 2 | 2 | 7 | L |
| [48]                                         | 2 | 2 | 2 | 2 | 8 | L |
| [49]                                         | 1 | 0 | 2 | 1 | 4 | M |
| [50]                                         | 2 | 2 | 2 | 2 | 8 | L |
| [51]                                         | 2 | 2 | 2 | 2 | 8 | L |
| [52]                                         | 1 | 2 | 2 | 2 | 7 | L |
| [53]                                         | 2 | 2 | 2 | 0 | 6 | M |
| [54]                                         | 2 | 2 | 2 | 1 | 7 | L |
| [55]                                         | 0 | 2 | 2 | 2 | 6 | M |
| <i>Cyanotoxins mixtures containing ATX-a</i> |   |   |   |   |   |   |
| [100]                                        | 2 | 2 | 2 | 0 | 6 | M |
| [101]                                        | 2 | 2 | 2 | 0 | 6 | M |
| [102]                                        | 2 | 1 | 2 | 1 | 6 | M |
| [56]                                         | 2 | 1 | 2 | 2 | 7 | L |
| [57]                                         | 0 | 2 | 2 | 1 | 5 | M |
| [58]                                         | 1 | 2 | 2 | 1 | 6 | M |
| [59]                                         | 1 | 2 | 2 | 1 | 6 | M |
| [60]                                         | 0 | 2 | 2 | 1 | 5 | M |
| [61]                                         | 2 | 2 | 2 | 1 | 7 | L |
| [62]                                         | 1 | 2 | 2 | 2 | 7 | L |
| [63]                                         | 1 | 1 | 1 | 1 | 4 | M |
| [64]                                         | 1 | 2 | 2 | 2 | 7 | L |
| [65]                                         | 2 | 2 | 2 | 2 | 8 | L |

|      |   |   |   |   |   |   |
|------|---|---|---|---|---|---|
| [66] | 2 | 2 | 2 | 2 | 8 | L |
| [67] | 2 | 2 | 2 | 2 | 8 | L |
| [68] | 2 | 2 | 2 | 2 | 8 | L |
| [69] | 2 | 1 | 2 | 2 | 7 | L |
| [70] | 2 | 2 | 2 | 2 | 8 | L |
| [71] | 2 | 2 | 2 | 2 | 8 | L |
| [72] | 2 | 2 | 2 | 2 | 8 | L |
| [73] | 2 | 2 | 2 | 2 | 8 | L |
| [74] | 2 | 2 | 2 | 2 | 8 | L |
| [75] | 2 | 2 | 2 | 2 | 8 | L |
| [76] | 2 | 2 | 2 | 2 | 8 | L |
| [77] | 2 | 2 | 2 | 2 | 8 | L |
| [78] | 2 | 2 | 1 | 1 | 6 | M |
| [79] | 2 | 2 | 2 | 2 | 8 | L |
| [80] | 2 | 2 | 2 | 2 | 8 | L |
| [23] | 1 | 2 | 2 | 2 | 7 | L |
| [81] | 2 | 2 | 2 | 2 | 8 | L |
| [82] | 0 | 2 | 2 | 2 | 6 | M |
| [83] | 2 | 2 | 2 | 2 | 7 | L |
